# Supplementary material for: Achieving large dynamic range control of gene expression with a compact RNA transcription–translation regulator
Source: PubMed Central journal article supplement (PMC5435934; doi:10.1093/nar/gkx215), 2017-04-06
Supplement: gkx215_Supp.pdf [file gkx215_Supp.pdf]

## Supporting Information for

# Achieving large dynamic range control of gene expression with a compact RNA transcription-translation regulator

Alexandra M. Westbrook<sup>1</sup> and Julius B. Lucks<sup>2,\*</sup>

<sup>1</sup> Robert F. Smith School of Chemical and Biomolecular Engineering, Cornell University, Ithaca, NY, 14853, USA

<sup>2</sup> Department of Chemical and Biological Engineering, Northwestern University, Evanston, IL, 60208, USA

\* To whom correspondence should be addressed. Tel: 1.847.467.2943; Fax: 1.847.491.3728; Email: jblucks@northwestern.edu

|            | Description                                                                     |
|------------|---------------------------------------------------------------------------------|
| Table S1   | Important DNA sequences                                                         |
| Table S2   | Plasmids used in this study                                                     |
| Figure S1  | Plasmid architectures used in this study                                        |
| Note S1    | Supplementary Materials and Methods                                             |
| Figure S2  | Day 1, 2, and 3 of repressor cascade                                            |
| Figure S3  | Repressor cascade from glycerol stock                                           |
| Figure S4  | RepC Knockout                                                                   |
| Figure S5  | qRT-PCR                                                                         |
| Figure S6  | Transcriptional activator mechanism                                             |
| Figure S7  | In vivo expression data used to calculate orthogonality matrices                |
| Figure S8  | Sequence and structure of the pT181 dual control attenuator                     |
| Figure S9  | Sequence and structure of the pT181 antisense and truncated pT181 antisense     |
| Figure S10 | Induction curves                                                                |
| Table S3   | Averages and standard deviations for Figure 2A and 2B                           |
| Figure S11 | Sequence and structure of the pT181 dual control activator                      |
| Table S4   | Averages and standard deviations for Figure 3B and 3C                           |
| Figure S12 | Sequence and structure of interaction regions for antisense mutants and fusions |
| Table S5   | Averages and standard deviations for Figure 4B and 4C                           |
| Table S6   | Standard deviations for orthogonality matrix repression Figure 5B               |
| Table S7   | Standard deviations for orthogonality matrix repression Figure 5C               |
| References |                                                                                 |

**Table S1:** Important DNA sequences

| Name                                                                         | Sequence                                                                                                                                                                                                                                                                                                                                                                                                                                                                                                                                                                                                                                                                                                                                                                                                                                                                                                                                                                                                                                                                                                                                               |
|------------------------------------------------------------------------------|--------------------------------------------------------------------------------------------------------------------------------------------------------------------------------------------------------------------------------------------------------------------------------------------------------------------------------------------------------------------------------------------------------------------------------------------------------------------------------------------------------------------------------------------------------------------------------------------------------------------------------------------------------------------------------------------------------------------------------------------------------------------------------------------------------------------------------------------------------------------------------------------------------------------------------------------------------------------------------------------------------------------------------------------------------------------------------------------------------------------------------------------------------|
| J23119                                                                       | TTGACAGCTAGCTCAGTCCTAGGTATAATACTAGT                                                                                                                                                                                                                                                                                                                                                                                                                                                                                                                                                                                                                                                                                                                                                                                                                                                                                                                                                                                                                                                                                                                    |
| pLac Promoter                                                                | AATTGTGAGCGGATAACAATTGACATTGTGAGCGGATAACAAGATACT                                                                                                                                                                                                                                                                                                                                                                                                                                                                                                                                                                                                                                                                                                                                                                                                                                                                                                                                                                                                                                                                                                       |
| Super folder green fluorescent protein (Ribosome binding site (RBS) - SFGFP) | AGGAGGAAGGATCTATGAGCAAAGGAGAAGAAGCTTTTCACTGGAGTTGTCCG<br>AATTCTTGTGAATTAGATGGTGTATGTTAATGGGCACAAATTTCTGTCCGTGG<br>AGAGGGTGAAGGTGATGCTACAACGGAAAACCTCACCTTAAATTTATTTGCA<br>CTACTGGAAAACCTACCTGTTCCGTGGCCAACACTTGTCACTACTCTGACCTAT<br>GGTGTTC AATGCTTTTCCCGTTATCCGGATCACATGAAACGGCATGACTTTTT<br>CAAGAGTGCCATGCCCGAAGGTTATGTACAGGAACGCACTATATCTTTCAAAG<br>ATGACGGGACCTACAAGACGCGTGTGAAGTCAAGTTTGAAGGTGATACCCT<br>TGTTAATCGTATCGAGTTAAAGGGTATTGATTTTAAAGAAGATGGAACATTCT<br>TGGACACAACTCGAGTACAACTTAACTCACACAATGTATACATCACGGCAG<br>ACAAACAAAAGAATGGAATCAAAGCTAACTTCAAAATTCGCCACAACGTTGAA<br>GATGGTTCCGTTCACTAGCAGACCATTATCAACAAAATACTCCAATTGGCGA<br>TGGCCCTGTCCTTTTACCAGACAACCATTACCTGTCGACACAATCTGTCCTTT<br>CGAAAGATCCCAACGAAAAGCGTGACCACATGGTCCTTCTTGAGTTTGTAACT<br>GCTGCTGGGATTACACATGGCATGGATGAGCTCTACAA                                                                                                                                                                                                                                                                                                                                                |
| TrrnB                                                                        | GAAGCTTGGGCCCGAACAAAACTCATCTCAGAAGAGGATCTGAATAGCGCC<br>GTCGACCATCATCATCATCATTGAGTTTAAACGGTCTCCAGCTTGGCTGT<br>TTTGGCGGATGAGAGAAGATTTTCCAGCCTGATACAGATTAATCAGAACGCAG<br>AAGCGGTCTGATAAAACAGAATTTGCCTGGCAGCAGTAGCGCGGTGGTCCCA<br>CCTGACCCCATGCCGAACCTCAGAAGTAAACGCCGTAGCGCCGATGGTAGTG<br>TGGGGTCTCCCATGCGAGAGTAGGGAACCTGCCAGGCATCAAATAAACGAA<br>AGGCTCAGTCGAAAGACTGGGCCTTTCGTTTTATCTGTTGTTTGTGCGGTGAAC<br>T                                                                                                                                                                                                                                                                                                                                                                                                                                                                                                                                                                                                                                                                                                                                               |
| Monomeric Red fluorescent protein (mRFP)                                     | ATGGCAAGTAGCGAAGACGTTATCAAAGAGTTCATGCGTTTTCAAAGTTCGTAT<br>GGAAGGTTCCGTTAACGGTCACGAGTTCGAAATCGAAGGTGAAGGTGAAGGT<br>CGTCCGTACGAAGGTACCCAGACCGCTAAACTGAAAGTTACCAAAGGTGGTC<br>CGCTGCCGTTCCGTTGGGACATCCTGTCCCGCAGTTCAGTACGGTTCCAA<br>AGCTTACGTTAAACACCCGGCTGACATCCCGGACTACCTGAAACTGTCCTTCC<br>CGGAAGGTTTCAAATGGGAACGTGTTATGAACTTCGAAGACGGTGGTGTGTT<br>ACCGTTACCCAGGACTCCTCCCTGCAAGACGGTGAGTTCATCTACAAAAGTTAA<br>ACTGCGTGGTACCAACTTCCCGTCCGACGGTCCGGTTATGCAGAAAAAACCC<br>ATGGGTTGGGAAGCTTCCACCGAACGATGTACCCGGAAAGACGGTGTCTGTA<br>AAGGTGAAATCAAATGCGTCTGAAACTGAAAGACGGTGGTCACTACGACGC<br>TGAAAGTTAAAACCACCTACATGGCTAAAAAACCGGTTTCCAGCTGCCGGGTGCTT<br>ACAAAACCGACATCAAACCTGGACATCACCTCCCAACGAAGACTACACCATC<br>GTTGAACAGTACGAACGTGCTGAAGGTCGTCACCTCCACCGGTGCTTAATAA                                                                                                                                                                                                                                                                                                                                                                                             |
| LacI ORF                                                                     | GGCACGTAAGAGGTTCCAACTTTACCATAATGAAACATACTAGAGAAAGAGG<br>AGAAATACTAGATGGTGAATGTGAAACCAGTAACGTTATACGATGTCGCAGAG<br>TATGCCGGTGTCTCTTATCAGACCGTTTCCCGCGTGGTGAACCAGGCCAGCC<br>ACGTTTCTGCGAAAACGCGGGAAAAAGTGGAAAGCGGCATGGCGGAGCTGA<br>ATTACATTCCCAACCGCGTGGCACAACAACCTGGCGGGCAAACAGTCGTTGCT<br>GATTGGCGTTGCCACCTCCAGTCTGGCCCTGCACGCGCCGTCGCAAATTGTC<br>GCGGCGATTAATCTCGCGCCGATCAACTGGGTGCCAGCGTGGTGGTGTCCG<br>ATGGTAGAACGAAGCGGCGTCAAGCCTGTAAAGCGGCGGTGCACAATCTTC<br>TCGCGCAACGCGTCAGTGGGCTGATCATTAACTATCCGCTGGATGACCAGGA<br>TGCCATTGCTGTGGAAGCTGCCTGCACTAATGTTCCGGCGTTATTTCTTGATG<br>TCTCTGACCAGACACCCATCAACAGTATTATTTTCTCCCATGAAGACGGTACC<br>CGACTGGGCGTGGAGCATCTGGTTCGATTGGGTCACCAGCAAATCGCGCTG<br>TTAGCGGGCCATTAAGTTCTGTCTCGGCGCGTCTGCGTCTGGCTGGCTGGC<br>ATAAATATCTCACTCGCAATCAAATTCAGCCGATAGCGGAACGGGAAGGCCA<br>CTGGAGTGCCATGTCCGGTTTTCAACAAACCATGCAAATGCTGAATGAGGGC<br>ATCGTTCCCACTGCGATGCTGGTTGCCAACGATCAGATGGCGCTGGGCGCAA<br>TGCGCGCCATTACCGAGTCCGGGCTGCGCGTTGGTGCGGATATCTCGGTAG<br>TGGGATACGACGATACCGAAGACAGCTCATGTTATATCCCGCCGTTAACCA<br>CATCAAACAGGATTTTCCGCTGCTGGGGCAAACCGCGTGGACCGCTTGCTG<br>CAACTCTCAGGGCCAGGCGGTGAAGGGCAATCAGCTGTTGCCCGTCTCAC |

|                                                                                                            |                                                                                                                                                                                                                                                                                                                                                     |
|------------------------------------------------------------------------------------------------------------|-----------------------------------------------------------------------------------------------------------------------------------------------------------------------------------------------------------------------------------------------------------------------------------------------------------------------------------------------------|
|                                                                                                            | TGGTGAAAAGAAAAACCACCCTGGCGCCCAATACGCAAAACCGCCTCTCCCCG<br>CGCGTTGGCCGATTCATTAATGCAGCTGGCAGCAGAGTTTCCCGACTGGAA<br>AGCGGGCAGGCTGCAAACGACGAAAACACTACGCTTAGTAGCTTAATAACTCT<br>GATAGTGCTAGTGTAGATCCCTACTAGAGCCAGGCATCAAATAAAACGAAAGG<br>CTCAGTCGAAAGACTGGGCTTTTCGTTTTATCTGTTGTTTGTCCGGTGAACGCT<br>CTCTACTAGAGTCACACTGGCTCACCTTCGGGTGGGCCTTTCTGCGTTTATA    |
| Theophylline<br>aptamer-<br>pT181-<br>mutant<br>antisense<br>(aptamer-<br>antisense-<br>sTRSV<br>Ribozyme) | GGTGATACCAGCATCGTCTTGATGCCCTTGGCAGCACCTCTTTGAATGGTGCT<br>GCCCTGCAACTTTGGCGAGGGACAGGGCGACTCCTTTTTATTCTGTCACCG<br>GATGTGCTTTCCGGTCTGATGAGTCCGTGAGGACGAAACAG                                                                                                                                                                                           |
| sTRSV<br>Ribozyme                                                                                          | CTGTCACCGGATGTGCTTTCCGGTCTGATGAGTCCGTGAGGACGAAACAG                                                                                                                                                                                                                                                                                                  |
| Double<br>pT181<br>antisense<br>(BamHI-BglII<br>Scar-sTRSV<br>Ribozyme<br>antisense)x2                     | GGATCTCTGTCACCGGATGTGCTTTCCGGTCTGATGAGTCCGTGAGGACGAA<br>ACAGGGATCTATACAAGATTATAAAAACAACTCAGTGTTTTTTCTTTGAATGA<br>TGTCGTTACAAACTTTGGTCAGGGCGTGAGCGACTCCTTTTTATTGGATCT<br>CTGTCACCGGATGTGCTTTCCGGTCTGATGAGTCCGTGAGGACGAAACAGGG<br>ATCCTAACTCGAGATACAAGATTATAAAAACAACTCAGTGTTTTTTCTTTGAAT<br>GATGTCGTTACAAACTTTGGTCAGGGCGTGAGCGACTCCTTTTTATTGGAT<br>CT |
| pT181<br>repressor<br>(sense target<br>– repC 96nt<br>fragment)                                            | AACAAAATAAAAAGGAGTCGCTCACGCCCTGACCAAAGTTTGTGAACGACATC<br>ATTCAAAGAAAAAACACTGAGTTGTTTTATAATCTTGATATTTAGATATTAA<br>ACGATATTTAAATATACATAAAGATATATATTTGGGTGAGCGATTCTTAAACG<br>AAATTGAGATTAAGGAGTCGCTCTTTTTATGTATAAAAACAATCATGCAAATC<br>ATTCAAATCATTGGAAAATCACGATTTAGACAATTTTTCTAAAACCGGCTACT<br>CTAATAGCCGGTTGTAAAGGATCT                                |
| pT181<br>repressor<br>with WT<br>terminator<br>(sense target<br>– repC 96nt<br>fragment)                   | AACAAAATAAAAAGGAGTCGCTCACGCCCTGACCAAAGTTTGTGAACGACATC<br>ATTCAAAGAAAAAACACTGAGTTGTTTTATAATCTTGATATTTAGATATTAA<br>ACGATATTTAAATATACATAAAGATATATATTTGGGTGAGCGATTCTTAAACG<br>AAATTGAGATTAAGGAGTCGATTTTTATGTATAAAAACAATCATGCAAATCAT<br>CAAATCATTGGAAAATCACGATTTAGACAATTTTTCTAAAACCGGCTACTCTA<br>ATAGCCGGTTGTAAAGGATCT                                   |
| pT181-<br>mutant 1<br>repressor<br>(sense target<br>– repC 96nt<br>fragment)                               | AACAAAATAAAAAGGAGTCGCTCTGTCCCTCGCCAAAGTTGCAGAACGACATC<br>ATTCAAAGAAAAAACACTGAGTTGTTTTATAATCTTGATATTTAGATATTAA<br>ACGATATTTAAATATACATAAAGATATATATTTGGGTGAGCGATTCTTAAACG<br>AAATTGAGATTAAGGAGTCGCTCTTTTTATGTATAAAAACAATCATGCAAATC<br>ATTCAAATCATTGGAAAATCACGATTTAGACAATTTTTCTAAAACCGGCTACT<br>CTAATAGCCGGTTGTAAAGGATCT                                |
| pT181-<br>mutant 2<br>repressor<br>(sense target<br>– repC 96nt<br>fragment)                               | AACAAAATAAAAAGGAGTCGCTCGTACCCTCTGCAAAGTTAACGAACGACATC<br>ATTCAAAGAAAAAACACTGAGTTGTTTTATAATCTTGATATTTAGATATTAA<br>ACGATATTTAAATATACATAAAGATATATATTTGGGTGAGCGATTCTTAAACG<br>AAATTGAGATTAAGGAGTCGCTCTTTTTATGTATAAAAACAATCATGCAAATC<br>ATTCAAATCATTGGAAAATCACGATTTAGACAATTTTTCTAAAACCGGCTACT<br>CTAATAGCCGGTTGTAAAGGATCT                                |
| Fusion 3<br>repressor<br>(sense target<br>– repC 96nt<br>fragment)                                         | AACAAAATAAAAAGGAGTCGCTCACGCCTCGAACTTGGCGGAACGCAGTGTG<br>AACGACATCATTCAAAGAAAAAACACTGAGTTGTTTTATAATCTTGATATTT<br>AGATATTAACGATATTTAAATATACATAAAGATATATATTTGGGTGAGCGATT<br>CCTTAAACGAAATTGAGATTAAGGAGTCGCTCTTTTTATGTATAAAAACAATC<br>ATGCAAATCATTCAAATCATTGGAAAATCACGATTTAGACAATTTTTCTAAAAC<br>CGGCTACTCTAATAGCCGGTTGTAAAGGATCT                        |
| Fusion 4<br>repressor<br>(sense target<br>– repC 96nt<br>fragment)                                         | AACAAAATAAAAAGGAGTCGCTCACGTTCAACTTTGGCGAGTACGATGTGAAC<br>GACATCATTCAAAGAAAAAACACTGAGTTGTTTTATAATCTTGATATTTAGA<br>TATTAACGATATTTAAATATACATAAAGATATATATTTGGGTGAGCGATTCTT<br>AAACGAAATTGAGATTAAGGAGTCGCTCTTTTTATGTATAAAAACAATCATGC<br>AAATCATTCAAATCATTGGAAAATCACGATTTAGACAATTTTTCTAAAACCGG                                                            |

|                                                                                        |                                                                                                                                                                                                                               |
|----------------------------------------------------------------------------------------|-------------------------------------------------------------------------------------------------------------------------------------------------------------------------------------------------------------------------------|
|                                                                                        | CTACTCTAATAGCCGGTTGTAAGGATCT                                                                                                                                                                                                  |
| pT181 activator<br>(sense target – repC 96nt fragment)                                 | TTGGGTGAGCGATTCTTAAACGAAATTGAGATTAAGGAGTCGCTCTTTTTTTT<br>TTATGTATAAAAAACAATCATGCAAATCATTCAAATCATTGGAAAATCACGATT<br>AGACAATTTTTCTAAAACCGGCTACTCTAATAGCCGGTTGTAAGGATCT                                                          |
| pT181 dual control activator<br>(sense target – repC 12nt fragment)                    | TTGGGTGAGCGATTCTTAAACGAAATTGAGATTAAGGAGTCGATTTTTTATGT<br>ATAAAAAAC                                                                                                                                                            |
| pT181 dual control repressor with WT terminator<br>(sense target – repC 12nt fragment) | AACAAAATAAAAAGGAGTCGCTCACGCCCTGACCAAAGTTTGTGAACGACATC<br>ATTCAAAGAAAAAAACACTGAGTTGTTTTTATAATCTTGTATATTTAGATATTAA<br>ACGATATTTAAATATACATAAAGATATATATTTGGGTGAGCGATTCTTAAACG<br>AAATTGAGATTAAGGAGTCGATTTTTTATGTATAAAAAAC         |
| pT181 dual control repressor<br>(sense target – repC 12nt fragment)                    | AACAAAATAAAAAGGAGTCGCTCACGCCCTGACCAAAGTTTGTGAACGACATC<br>ATTCAAAGAAAAAAACACTGAGTTGTTTTTATAATCTTGTATATTTAGATATTAA<br>ACGATATTTAAATATACATAAAGATATATATTTGGGTGAGCGATTCTTAAACG<br>AAATTGAGATTAAGGAGTCGCTCTTTTTTATGTATAAAAAAC       |
| pT181 mutant 1 dual control repressor<br>(sense target – repC 12nt fragment)           | AACAAAATAAAAAGGAGTCGCTCTGTCCCTCGCCAAAGTTGCAGAACGACATC<br>ATTCAAAGAAAAAAACACTGAGTTGTTTTTATAATCTTGTATATTTAGATATTAA<br>ACGATATTTAAATATACATAAAGATATATATTTGGGTGAGCGATTCTTAAACG<br>AAATTGAGATTAAGGAGTCGATTTTTTATGTATAAAAAAC         |
| pT181 mutant 2 dual control repressor<br>(sense target – repC 12nt fragment)           | AACAAAATAAAAAGGAGTCGCTCGTACCCTCTGCAAAGTTAACGAACGACATC<br>ATTCAAAGAAAAAAACACTGAGTTGTTTTTATAATCTTGTATATTTAGATATTAA<br>ACGATATTTAAATATACATAAAGATATATATTTGGGTGAGCGATTCTTAAACG<br>AAATTGAGATTAAGGAGTCGATTTTTTATGTATAAAAAAC         |
| Fusion 3 dual control repressor<br>(sense target – repC 12nt fragment)                 | AACAAAATAAAAAGGAGTCGCTCACGCCCTCGAACTTGCGGAACGCAGTGTG<br>AACGACATCATTCAAAGAAAAAAACACTGAGTTGTTTTTATAATCTTGTATATTT<br>AGATATTAACGATATTTAAATATACATAAAGATATATATTTGGGTGAGCGATT<br>CCTTAAACGAAATTGAGATTAAGGAGTCGATTTTTTATGTATAAAAAAC |
| Fusion 4 dual control repressor<br>(sense target – repC 12nt fragment)                 | AACAAAATAAAAAGGAGTCGCTCACGTTCAACTTTGGCGAGTACGATGTGAAC<br>GACATCATTCAAAGAAAAAAACACTGAGTTGTTTTTATAATCTTGTATATTTAGA<br>TATTAACGATATTTAAATATACATAAAGATATATATTTGGGTGAGCGATTCTT<br>AAACGAAATTGAGATTAAGGAGTCGATTTTTTATGTATAAAAAAC    |
| pT181 antisense                                                                        | ATACAAGATTATAAAAACAACCTCAGTGTTTTTTCTTTGAATGATGTCGTTCCACA<br>AACTTTGGTCAGGGCGTGAGCGACTCCTTTTTATTGGATCT                                                                                                                         |
| pT181 mutant 1 antisense                                                               | ATACAAGATTATAAAAACAACCTCAGTGTTTTTTCTTTGAATGATGTCGTTCTGC<br>AACTTTGGCGAGGGACAGAGCGACTCCTTTTTATTGGATCT                                                                                                                          |
| pT181 mutant 2 antisense                                                               | ATACAAGATTATAAAAACAACCTCAGTGTTTTTTCTTTGAATGATGTCGTTCTGTT<br>AACTTTGCAGAGGGTACGAGCGACTCCTTTTTATTGGATCT                                                                                                                         |

|                                    |                                                                                                               |
|------------------------------------|---------------------------------------------------------------------------------------------------------------|
| Fusion 4 antisense                 | ATACAAGATTATAAAAACAACCTCAGTGTTTTTTCTTTGAATGATGTCGTTCCACA<br>TCGTA CTCCGCCAAAGTTGAACGTGAGCGACTCCTTTTTATTGGATCT |
| Fusion 3 antisense                 | ATACAAGATTATAAAAACAACCTCAGTGTTTTTTCTTTGAATGATGTCGTTCCACA<br>CTGCGTTCCGCCAAAGTTGAGGCGTGAGCGACTCCTTTTTATTGGATCT |
| pT181 activator antisense          | AACAAAATAAAGCAATAAGGAATCGCTCACCCAAAGGATCT                                                                     |
| pT181 truncated antisense          | TGAATGATGTCGTTCCACAACTTTGGTCAGGGCGTGAGCGACTCCTTTTTGGA<br>TCT                                                  |
| Fusion 3 truncated antisense       | TGAATGATGTCGTTCCACTGCGTTCCGCCAAAGTTGAGGCGTGAGCGACTC<br>CTTTTTGGATCT                                           |
| pT181 mutant 1 truncated antisense | TGAATGATGTCGTTCTGCAACTTTGGCGAGGGACAGAGCGACTCCTTTTTGGA<br>TCT                                                  |
| pT181 mutant 2 truncated antisense | TGAATGATGTCGTTTCGTTAACTTTGCAGAGGGTACGAGCGACTCCTTTTTGGA<br>TCT                                                 |
| Fusion 4 truncated antisense       | TGAATGATGTCGTTCCATCGTACTCGCCAAAGTTGAACGTGAGCGACTCCTT<br>TTTGGATCT                                             |

**Table S2** – Plasmids used in this study. Sequences in the plasmid architecture can be found in Table S1.

| Plasmid # | Plasmid architecture                                                                                                 | Name                     | Figure              | Figure S1 map |
|-----------|----------------------------------------------------------------------------------------------------------------------|--------------------------|---------------------|---------------|
| JBL001    | TrnB – CmR – p15A origin                                                                                             | CmR/p15A control         | 2-6, S2-5, S7, S10  | B             |
| JBL002    | J23119 – TrnB – ColE1 origin – AmpR                                                                                  | No antisense control     | 2-6, S2-5, S7, S10  | A             |
| JBL003    | J23119 – pT181 sense target – <i>repC</i> (1-96) – RBS – SFGFP – TrnB – CmR – p15A origin                            | pT181 repressor WT term  | 2                   | D             |
| JBL004    | J23119 – pT181 antisense – TrnB – ColE1 origin – AmpR                                                                | pT181 antisense          | 2, 4, 5, S4, S5, S7 | C             |
| JBL006    | J23119 – pT181 sense target mutant terminator – <i>repC</i> (1-96) – RBS – SFGFP – TrnB – CmR – p15A origin          | pT181 repressor mut term | 2, 4, S5, S10       | D             |
| JBL007    | J23119 – pT181 mutant 1 sense target mutant terminator – <i>repC</i> (1-96) – RBS – SFGFP – TrnB – CmR – p15A origin | pT181 mutant 1 repressor | 4                   | D             |
| JBL008    | J23119 – pT181 mutant 1 antisense – TrnB – ColE1 origin – AmpR                                                       | pT181 mutant 1 antisense | 4, 5, S7            | C             |
| JBL009    | J23119 – pT181 mutant 2 sense target mutant terminator – <i>repC</i> (1-96) – RBS – SFGFP – TrnB – CmR – p15A origin | pT181 mutant 2 repressor | 4                   | D             |
| JBL010    | J23119 – pT181 mutant 2 antisense – TrnB – ColE1 origin – AmpR                                                       | pT181 mutant 2 antisense | 4, 5, S7            | C             |
| JBL021    | LacI ORF – pLac – pT181 antisense – TrnB – ColE1 origin – AmpR                                                       | IPTG inducible antisense | S10                 | E             |
| JBL1033   | J23119 – Fusion 4 antisense – TrnB – ColE1 origin – AmpR                                                             | Fusion 4 antisense       | 4, 5, S7            | C             |
| JBL1035   | J23119 – Fusion 3 antisense – TrnB – ColE1 origin – AmpR                                                             | Fusion 3 antisense       | 4, 5, S7            | C             |
| JBL1039   | J23119 – Fusion 3 sense target mutant terminator – <i>repC</i> (1-96) – RBS – SFGFP – TrnB – CmR – p15A origin       | Fusion 3 repressor       | 4                   | D             |

|         |                                                                                                                                                              |                                                |                          |   |
|---------|--------------------------------------------------------------------------------------------------------------------------------------------------------------|------------------------------------------------|--------------------------|---|
| JBL1126 | J23119 – Fusion 4 sense target mutant terminator – <i>repC</i> (1-96) – RBS – SFGFP – <i>TrrnB</i> – <i>CmR</i> – p15A origin                                | Fusion 4 repressor                             | 4                        | D |
| JBL1843 | J23119 – theophylline aptamer-pT181 mutant 1 antisense – sTRSV ribozyme – <i>TrrnB</i> – <i>ColE1</i> origin – <i>AmpR</i>                                   | Aptamer pT181 mutant 1 antisense, aptamer-AS-2 | 6, S2, S3                | G |
| JBL1844 | J23119 – pT181 mutant 1 sense target mutant terminator – <i>repC</i> (1-96) – (sTRSV ribozyme – pT181 antisense)x2 – <i>TrrnB</i> – <i>CmR</i> – p15A origin | Cascade L2 on p15A/ <i>CmR</i> backbone        | 6, S2, S3                | H |
| JBL1855 | J23119 – pT181 sense target – <i>repC</i> (1-96) – RBS – SFGFP – <i>TrrnB</i> – pSC101 origin – <i>KanR</i>                                                  | pT181 repressor                                | 6, S2, S3                | I |
| JBL1856 | <i>TrrnB</i> – pSC101 origin – <i>KanR</i>                                                                                                                   | pSC101/ <i>KanR</i> control                    | 6, S2, S3                | J |
| JBL2071 | J23119 – pT181 activator – RBS – SFGFP – <i>TrrnB</i> – <i>CmR</i> – p15A origin                                                                             | pT181 activator                                | 3                        | D |
| JBL2128 | J23119 – pT181 activator antisense – <i>TrrnB</i> – <i>ColE1</i> origin – <i>AmpR</i>                                                                        | pT181 activator antisense                      | 3                        | C |
| JBL2412 | J23119 – pT181 dual control sense target – <i>repC</i> (1-12) – SFGFP – <i>TrrnB</i> – <i>CmR</i> – p15A origin                                              | pT181 DC repressor WT term                     | 2, 4, 5, S4, S5, S7, S10 | D |
| JBL2413 | J23119 – pT181 dual control sense target mutant terminator – <i>repC</i> (1-12) – SFGFP – <i>TrrnB</i> – <i>CmR</i> – p15A origin                            | pT181 DC repressor                             | 2                        | D |
| JBL2415 | J23119 – pT181 dual control mutant 1 sense target – <i>repC</i> (1-12) – SFGFP – <i>TrrnB</i> – <i>CmR</i> – p15A origin                                     | pT181 DC mutant 1 repressor                    | 4, 5, S7                 | D |
| JBL2421 | J23119 – pT181 dual control activator sense target – <i>repC</i> (1-12) – SFGFP – <i>TrrnB</i> – <i>CmR</i> – p15A origin                                    | pT181 DC activator                             | 4, 5, S7                 | D |
| JBL2427 | J23119 – Fusion 3 dual control sense target – <i>repC</i> (1-12) – SFGFP – <i>TrrnB</i> – <i>CmR</i> – p15A origin                                           | Fusion 3 DC repressor                          | 4, 5, S7                 | D |
| JBL2432 | J23119 – pT181 dual control mutant 2 sense target – <i>repC</i> (1-12) – SFGFP – <i>TrrnB</i> – <i>CmR</i> – p15A origin                                     | pT181 DC mutant 2 repressor                    | 4, 5, S7                 | D |
| JBL2434 | J23119 – Fusion 4 dual control sense target – <i>repC</i> (1-12) – SFGFP – <i>TrrnB</i> – <i>CmR</i> – p15A origin                                           | Fusion 4 DC repressor                          | 4, 5, S7                 | D |
| JBL2463 | J23119 – pT181 dual control sense target – <i>repC</i> (1-12) – RFP – RBS – SFGFP – <i>TrrnB</i> – <i>CmR</i> – p15A origin                                  | Dual control RFP/GFP                           | 2                        | F |
| JBL2464 | J23119 – pT181 truncated antisense – <i>TrrnB</i> – <i>ColE1</i> origin – <i>AmpR</i>                                                                        | pT181 truncated antisense                      | 5, S7                    | C |
| JBL2469 | J23119 – Fusion 3 truncated antisense – <i>TrrnB</i> – <i>ColE1</i> origin – <i>AmpR</i>                                                                     | Fusion 3 truncated antisense                   | 5, S7                    | C |
| JBL2489 | J23119 – pT181 mutant 1 truncated antisense – <i>TrrnB</i> – <i>ColE1</i> origin – <i>AmpR</i>                                                               | pT181 mutant 1 truncated antisense             | 5, S7                    | C |
| JBL2490 | J23119 – pT181 mutant 2 truncated antisense – <i>TrrnB</i> – <i>ColE1</i> origin – <i>AmpR</i>                                                               | pT181 mutant 2 truncated antisense             | 5, S7                    | C |
| JBL2491 | J23119 – Fusion 4 truncated antisense – <i>TrrnB</i> – <i>ColE1</i> origin – <i>AmpR</i>                                                                     | Fusion 4 truncated antisense                   | 5, S7                    | C |
| JBL2493 | J23119 – pT181 dual control sense target – <i>repC</i> (1-12) – SFGFP – <i>TrrnB</i> – pSC101 origin – <i>KanR</i>                                           | pT181 DC WT Term repressor                     | 6, S2, S3                | I |
| JBL2526 | J23119 – pT181 dual control sense target – SFGFP – <i>TrrnB</i> – <i>CmR</i> – p15A origin                                                                   | pT181 DC repressor RepC KO                     | S4                       | D |

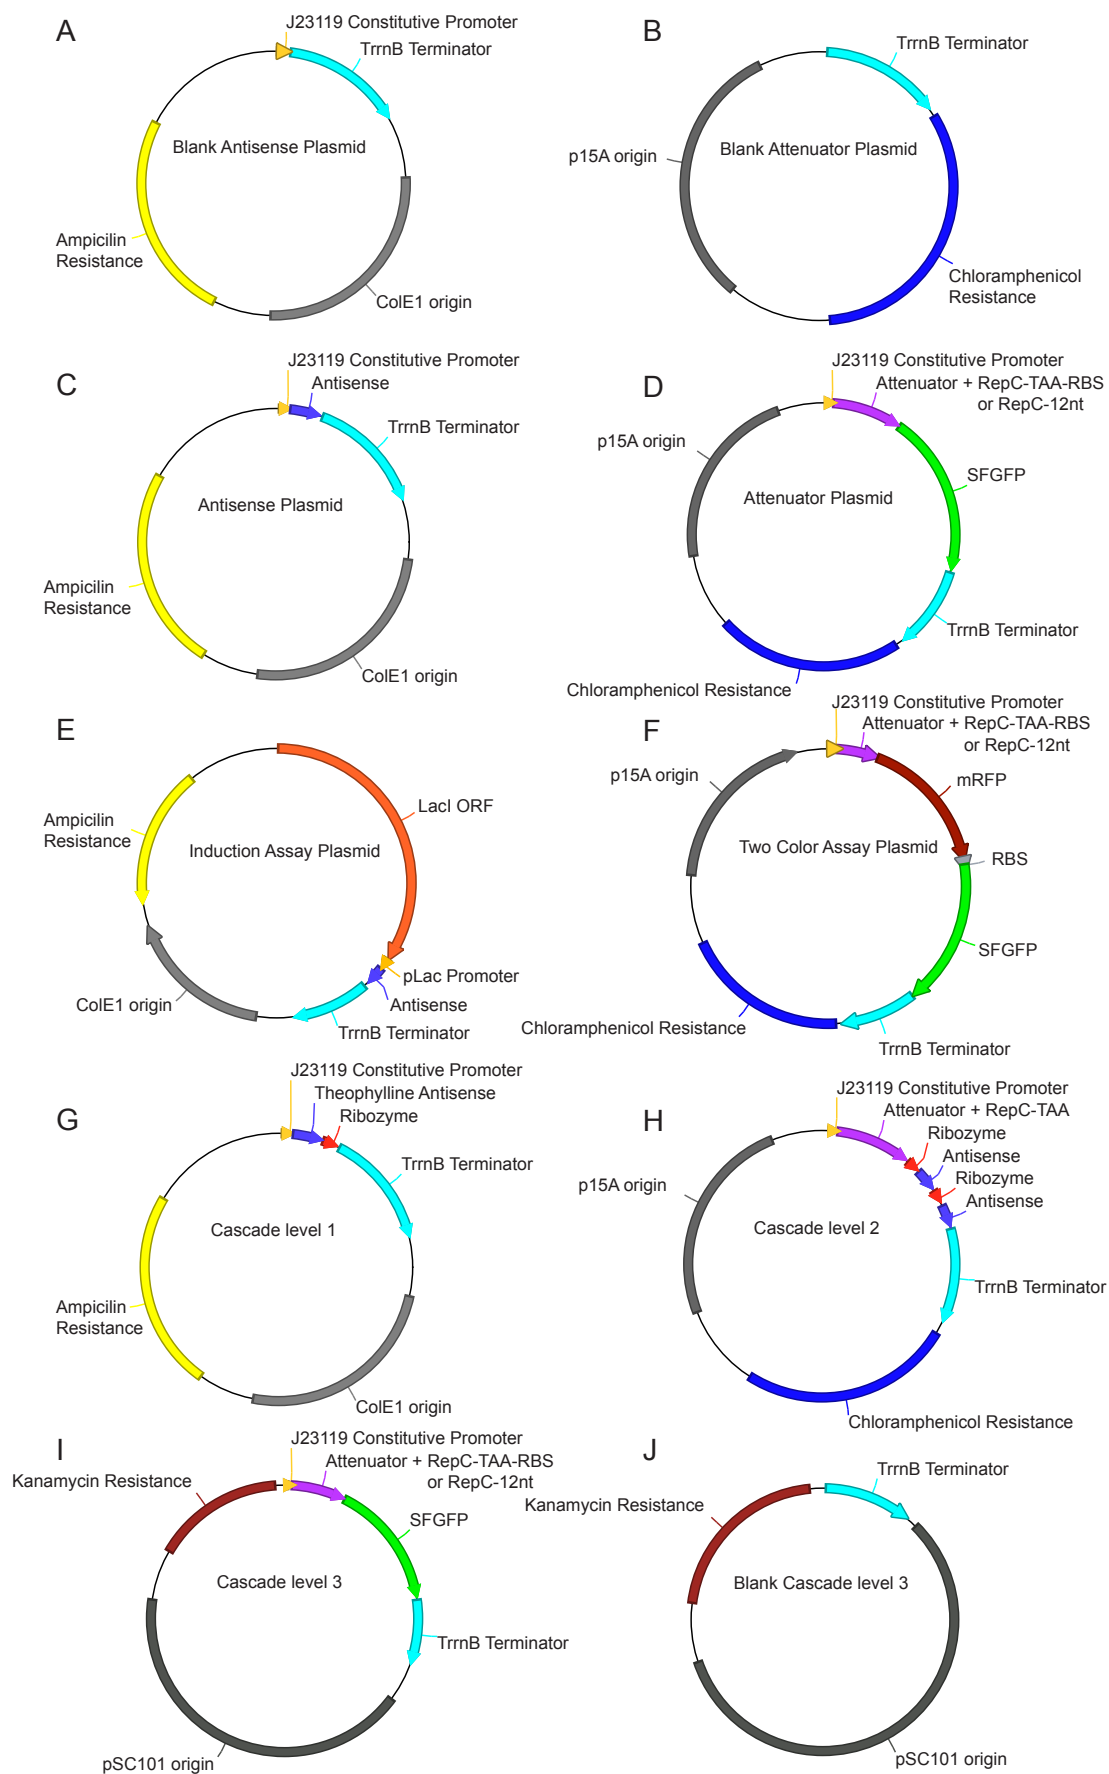

**Supplementary Figure S1:** Plasmid architectures for plasmids used in this study. (A) Antisense plasmid blank control (B) Attenuator plasmid blank control (C) Antisense plasmid architecture (D) Attenuator plasmid architecture (E) Induction assay plasmid architecture (F) Two color assay plasmid architecture (G) Architecture of level 1 (top level) of the cascade (H) Architecture of level 2 (mid level) of the cascade (I) Architecture of level 3 (bottom level) of the cascade (J) Cascade level 3 (bottom level) blank control plasmid. Specific sequences can be found in Table S1.

**Supplementary Note S1:** Supplementary Materials and Methods.

**Total RNA extraction for quantitative PCR.** qRT-PCR was performed following the MIQE guidelines (1). Strain, transformation, media, and growth conditions were all the same as for end point experiments described in the Materials in Methods in the main text. Plasmids were transformed, and subsequent colonies were grown overnight as described for *in vivo* bulk fluorescence measurements. For each biological replica, 20  $\mu$ l of a single overnight culture was added to three wells containing 980  $\mu$ l (1:50 dilution) of supplemented M9 minimal medium containing the selective antibiotics and grown for 4 h at the same conditions as the overnight cultures. For each plasmid combination, 500  $\mu$ l of cells were removed from three wells (grown from one colony) and combined into a 1.6-ml tube and pelleted by centrifugation at 13,000 r.p.m. for 1 min. Total RNA extraction was performed using Trizol reagent (Life Technologies) and an ethanol precipitation as described in Chappell et al. (2). The supernatant was removed, and the remaining pellet was resuspended in 750  $\mu$ l of Trizol reagent (Life Technologies), homogenized by repetitive pipetting, and incubated at room temperature for 5 min. 150  $\mu$ l of chloroform was added, and the samples were mixed for 15 s and incubated at room temperature for 3 min. Following incubation, the samples were centrifuged for 15 min at 12,000g at 4  $^{\circ}$ C, and 200  $\mu$ l of the top aqueous layer was removed. One microliter of glycogen (20  $\mu$ g/ $\mu$ l; Life Technologies) and 375  $\mu$ l of isopropanol were added to the aqueous phase, and the sample was incubated at room temperature for 10 min and centrifuged for 15 min at 15,000 r.p.m. at 4  $^{\circ}$ C. Following centrifugation, the isopropanol was carefully removed from the total RNA/glycogen pellets, washed in 600  $\mu$ l of chilled 70% ethanol (EtOH) and centrifuged for 2 min at 15,000 r.p.m. at 4  $^{\circ}$ C. EtOH was removed, and tubes were centrifuged for another 2 min at 15,000 r.p.m. at 4  $^{\circ}$ C to ensure that all of the ethanol was effectively removed. Pellets were resuspended in 20  $\mu$ l of RNase free double-distilled water (ddH<sub>2</sub>O) and stored at -80  $^{\circ}$ C.

**DNase treatment of total RNA for qPCR.** The total RNA was treated with Turbo DNase to remove any genomic or plasmid DNA from the RNA extraction (2). Purified total RNA samples were quantified by the Qubit Fluorometer (Life Technologies) and were diluted to a concentration of 30 ng/ $\mu$ l in a total of 10  $\mu$ l RNase free ddH<sub>2</sub>O and digested by Turbo DNase (Life Technologies) according to the manufacturer's protocol. After digestion, 150  $\mu$ l of RNase free ddH<sub>2</sub>O and 200  $\mu$ l phenol/chloroform was added, and the sample was vortexed for 10 s and incubated for 3 min at room temperature and centrifuged for 10 min at 15,000 r.p.m. at 4  $^{\circ}$ C. After centrifugation, 190  $\mu$ l of the top aqueous layer was carefully removed, 190  $\mu$ l of chloroform was added, and samples were vortexed for 10 s, incubated for 3 min at room temperature and centrifuged for 10 min at 15,000 r.p.m. at 4  $^{\circ}$ C. After centrifugation, 170  $\mu$ l of the top aqueous layer was carefully removed, 170  $\mu$ l of chloroform was added, and samples were vortexed for 10 s, incubated for 3 min at room temperature and centrifuged for 10 min at 15,000 r.p.m. at 4  $^{\circ}$ C. After centrifugation, 120  $\mu$ l of the top aqueous layer was carefully removed and added to 1  $\mu$ l glycogen, 360  $\mu$ l of chilled 100% EtOH and 12  $\mu$ l of 3 M sodium acetate, pH 5. Samples were vortexed for 10 s and stored at -80  $^{\circ}$ C for 1 h. Samples were then centrifuged for 30 min at 15,000 r.p.m. at 4  $^{\circ}$ C. Supernatant was removed, and the pellets were washed in 600  $\mu$ l of chilled 70% EtOH. Samples were then centrifuged for 2 min at 15,000 r.p.m. at 4  $^{\circ}$ C, and the EtOH was removed. Samples were recentrifuged for 2 min at 15,000 r.p.m. at 4  $^{\circ}$ C, and residual EtOH was removed, and pellets were air-dried for 10 min, and eluted in 10  $\mu$ l RNase free ddH<sub>2</sub>O and stored at -80  $^{\circ}$ C.

**Normalization of total RNA, reverse transcription and qPCR measurements.** To enable comparison between different samples, each DNase treated sample was normalized to contain the same total RNA concentration. Each sample was quantified by Qubit Fluorometer, and the sample was diluted to 1 ng/ $\mu$ l of total RNA in 12  $\mu$ l RNase free ddH<sub>2</sub>O. For the reverse transcription, one microliter of this total RNA, 1  $\mu$ l of 2  $\mu$ M reverse transcription primer (RT



SFGFP: TTATTTGTAGAGCTCATCCATG), 1  $\mu$ l of 10 mM of dNTPs (New England BioLabs) and RNase-free ddH<sub>2</sub>O (up to 6.5  $\mu$ l) were incubated for 5 min at 65 °C and cooled on ice for 5 min. 0.25  $\mu$ l of Superscript III reverse transcriptase (Life Technologies), 1  $\mu$ l of 100 mM Dithiothreitol (DTT), 1  $\mu$ l first-strand buffer (Life Technologies), 0.5  $\mu$ l RNaseOUT (Life Technologies) and RNase free H<sub>2</sub>O up to 3.5  $\mu$ l were then added, and the solution was incubated at 55 °C for 1 h, 75 °C for 15 min and then stored at -20 °C. qPCR was performed using 5  $\mu$ l of Maxima SYBR green qPCR master mix (Thermo Scientific), 1  $\mu$ l of cDNA and 0.5  $\mu$ l of 2  $\mu$ M SFGFP qPCR primers (SFGFP.Fwd: CACTGGAGTTGTCCCAATTCT, SFGFP.Rev: TCCGTTTGTAGCATCACCTTC) and RNase-free ddH<sub>2</sub>O up to 10  $\mu$ l. A Bio-Rad CFX Connect Real-Time System (Bio-Rad) was used for data collection using the following PCR program: 50 °C for 2 min, 95 °C for 10 min, followed by 30 cycles of 95 °C for 15 s and 60 °C for 1 min. All of the measurements were followed by melting curve analysis. A Hard-Shell 96-well PCR Plate (HSL9641, Bio-Rad) and a Microseal 'B' seal (MSB1001, Bio-Rad) were used for all measurements. Results were analyzed using Bio-Rad CFX Manager (V 3.1, Bio-Rad) by a relative standard curve. For quantification, a six-point standard curve covering a 100,000-fold range of SFGFP DNA concentrations ( $R^2 > 0.99$ ) was run in parallel and used to determine the relative SFGFP cDNA abundance in each sample. It was shown that the SFGFP qPCR primer set had a primer efficiency between 101–104%. All of the cDNA samples were measured in triplicate, and nontemplate controls run in parallel to control for contamination and nonspecific amplification or primer dimers. All NTC samples were quantified after 30 cycles. In addition, qPCR was performed on total RNA samples to confirm limited plasmid DNA contamination of cDNA samples. Control samples were quantified at least 4 cycles after their cDNA samples. Melting curve analysis was performed to confirm that only a single product was amplified. Units are reported as ng/ $\mu$ l  $\times 10^{-7}$  representing cDNA concentration in the processed samples.

**Induction curve assay.** Strain, transformation, media, and growth conditions were all the same as for end point experiments described in the Materials and Methods in the main text. Plasmid combinations were transformed into chemically competent *E. coli* TG1 cells, plated on Difco LB+Agar plates containing selective antibiotics and incubated overnight (approximately 17 hours) at 37°C. Plates were taken out of the incubator and left at room temperature for approximately 7 h. Three colonies were used to separately inoculate 300  $\mu$ L of LB containing selective antibiotics in a 2 mL 96-well block (Costar 3960), and grown approximately 17 h overnight at 37°C. Four microliters of this overnight culture was then added to 196  $\mu$ L (1:50 dilution) of supplemented M9 minimal media containing the selective antibiotics and the required amount of IPTG. After 4 h of incubation at 37C, 50  $\mu$ L of this culture was then transferred to a 96-well plate (Costar 3631) containing 50  $\mu$ L of phosphate buffered saline (PBS). Fluorescence (485 nm excitation, 520 nm emission) and optical density (OD, 600 nm) were then measured using a Biotek SynergyH1m plate reader.

**RepC Knockout Assay.** Strain, Transformation, media, and growth conditions were all the same for the end point experiments described in the Materials and Methods in the main text. After the 4 h incubation at 37C in supplemented M9 minimal media, 50  $\mu$ L of this culture was then transferred to a 96-well plate (Costar 3631) containing 50  $\mu$ L of phosphate buffered saline (PBS). Fluorescence (485 nm excitation, 520 nm emission) and optical density (OD, 600 nm) were then measured using a Biotek SynergyH1m plate reader.

**In Vivo bulk fluorescence time course experiments from glycerol stocks,** Strain, transformation, media, and growth conditions were all the same as for end point experiments described in the Materials in Methods in the main text. Transformation plates containing *E. coli* TG1 cells transformed with three cascade plasmids (Supplementary Table S2) were taken out of the incubator and left at room temperature for approximately 7 h. Colonies were picked and incubated at 37C overnight in LB containing selective antibiotics. The following morning, 500 $\mu$ L of culture was mixed with 500 $\mu$ L of 50% glycerol and frozen at -80C. Three colonies were picked from the frozen glycerol stocks and used to inoculate 300  $\mu$ L of LB containing selective antibiotics in a 2 mL 96-well block (Costar 3960), and grown approximately 17 h overnight at the same conditions as described for an end point experiment (see Materials and Methods in main text). Cultures were diluted 1:50 in separate wells on a new block containing 1 mL of supplemented M9 minimal media containing the selective antibiotics and grown for 4 h at the same conditions as the overnight culture. Then theophylline was added to the theophylline condition to a final concentration of 2mM. Every 30 min for the next 4 h, 50  $\mu$ L from each of the fresh cultures was

removed from the 96-well block and transferred to a 96-well plate (Costar 3631) containing 50  $\mu$ L of phosphate buffered saline (PBS). SFGFP fluorescence (FL, 485 nm excitation, 520 nm emission) and optical density (OD, 600 nm) were then measured at each time point using a Biotek Synergy H1m plate reader.

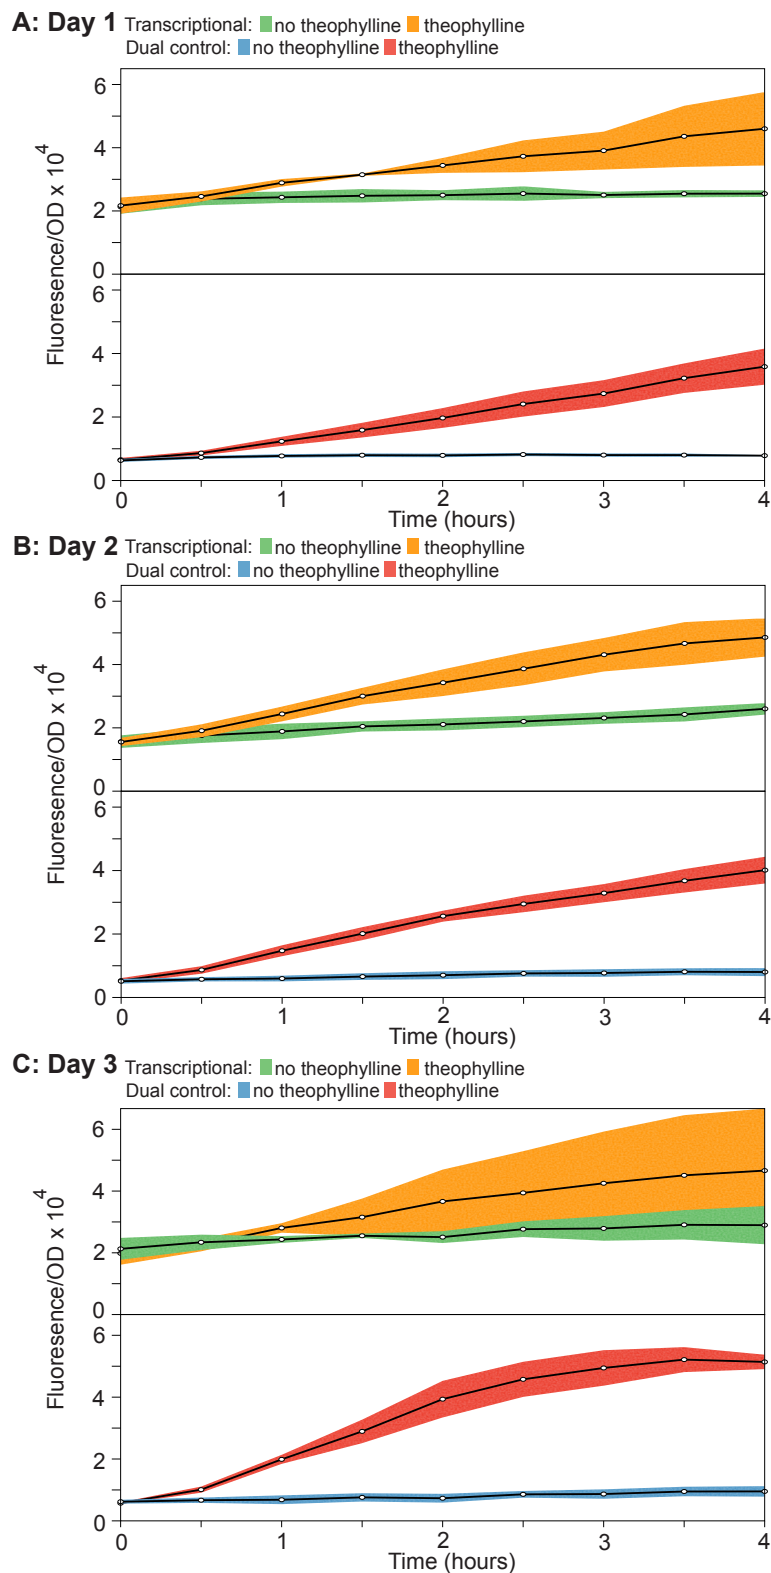

**Supplementary Figure S2:** Additional data for repressor cascade (Figure 6). Functional data for the transcriptional and dual control repressor cascades over time. All three plasmids were co-transformed into *E. coli* TG1 cells. Theophylline (2mM) is spiked at t=0 hours (orange for transcriptional and red for dual control) causing GFP to be expressed. Bulk fluorescence was measured using a plate reader (see Materials and Methods). The no theophylline condition is shown in green for the transcriptional cascade and blue for dual control. The dual control reduces circuit leak and the background fluorescence. The transformation, culturing, and measurements were done on different days for three days of experiments. The colored region indicates the standard deviation from three biological replicates.

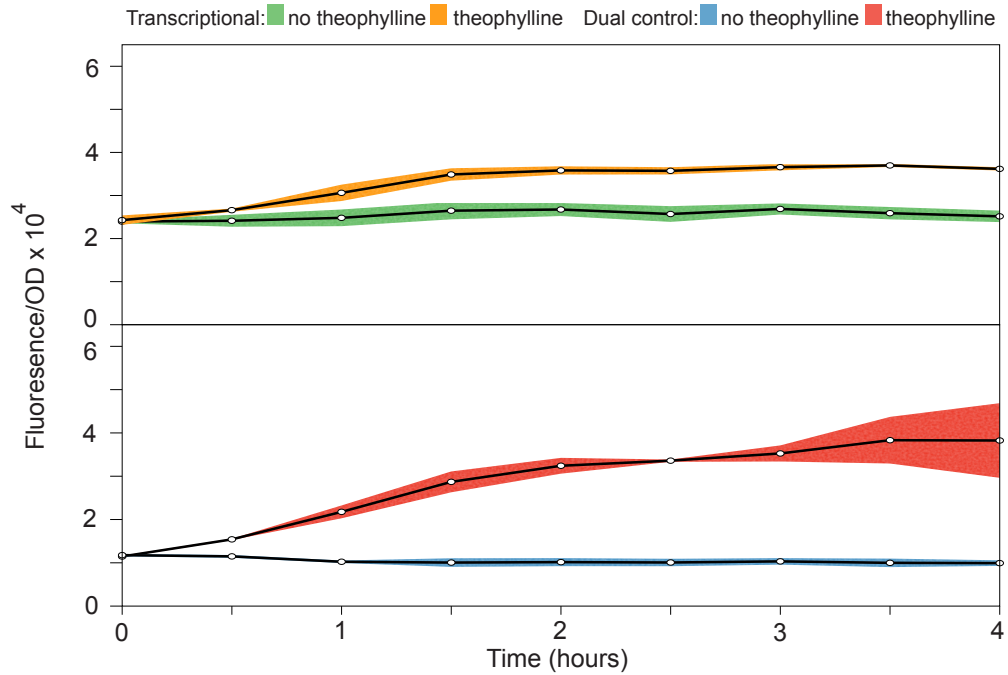

**Supplementary Figure S3:** Functional data for the transcriptional and dual control repressor cascades over time performed from glycerol stocked strains. Experiment performed as described in Supplementary Note S1. Data was analyzed as described in the Materials and Methods. The no theophylline condition is shown in green for the transcriptional cascade and blue for dual control. The dual control reduces circuit leak and the background fluorescence. The colored region indicates the standard deviation from three biological replicates.

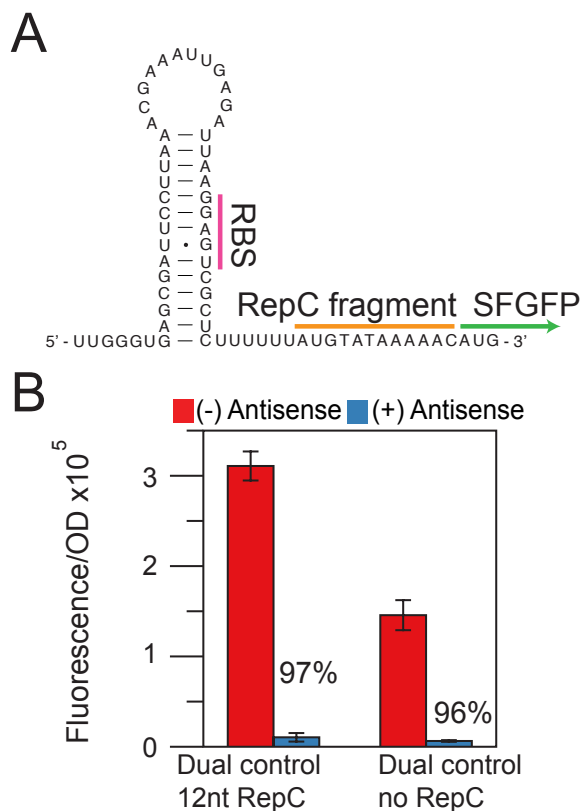

**Supplementary Figure S4:** Functionality of the 12nt RepC fusion versus complete RepC knockout. (A) Schematic of the pT181 transcriptional terminator with RBS (pink) and dual control 12nt fusion to RepC (orange) expressing SFGFP (green). The dual control with no RepC lacks the orange region. (B) Experiments were performed as described in Supplementary Note S1. Bulk fluorescence data was collected using a plate reader. The 12nt RepC fusion shows similar percent repression (97% +/- 1.5%) as the dual control with no RepC (96% +/- 0.8%), but has a much higher ON level. Error bars represent the standard deviation of nine biological replicates.

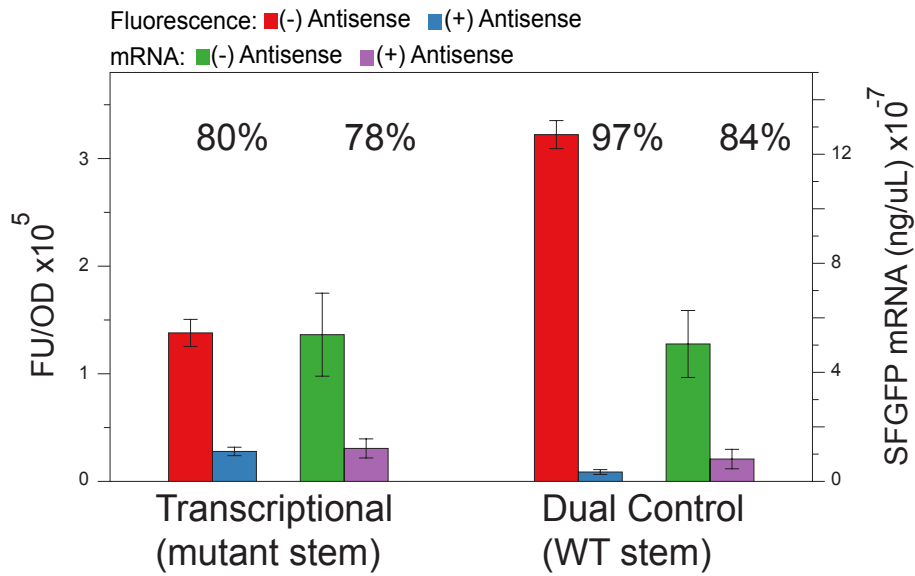

**Supplementary Figure S5:** Quantitative RT-PCR of a transcriptional and a dual control pT181 attenuator. qRT-PCR quantification was performed as described in Supplementary Note S1. Bulk fluorescence was measured using a plate reader from the same cultures as the RNA was extracted. The fluorescence ON levels (red) were significantly different ( $P > 0.05$  for Welch's t-test), but mRNA ON levels (green) were not significantly different. Transcriptional fluorescence repression (80%  $\pm$  3.4%) was similar to mRNA repression (78  $\pm$  9.1%) while dual control fluorescence repression (97%  $\pm$  0.7%) was much higher than mRNA repression (84%  $\pm$  8.1%). The error bars represent the standard deviation of three technical replicates of three biological replicates.

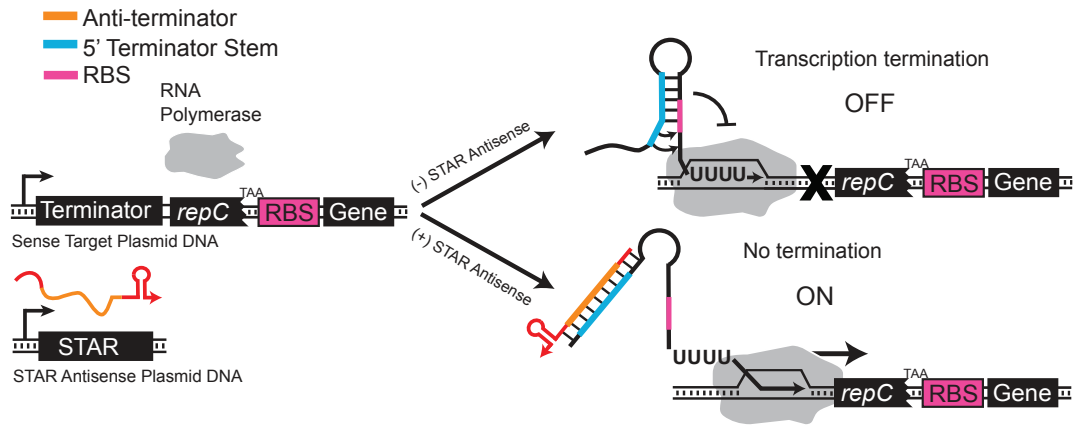

**Supplementary Figure S6:** Schematic of the pT181 anti-terminator STAR mechanism. The sense target region consists of the pT181 STAR target region from Chappell et al. (2) followed by a 96 nt fragment of the *repC* gene ending in a stop codon, TAA, included as a transcriptional fusion before a ribosome binding site (RBS) and the regulated gene of interest. In the absence of the STAR RNA (red/orange), the terminator forms, preventing downstream transcription by RNA polymerase (grey). Thus in the absence of STAR RNA the mechanism is transcriptionally OFF. The STAR RNA contains an anti-terminator sequence (orange) complementary to the 5' half of the terminator (blue). When present, the STAR RNA binds to the terminator, preventing terminator formation and allowing transcription elongation. Thus in the presence of STAR RNA the mechanism is transcriptionally ON.

### A. No truncations

### B. Truncations

Antisense: ■ None ■ Wild Type ■ Mutant 1 ■ Mutant 2 ■ Fusion 3 ■ Fusion 4

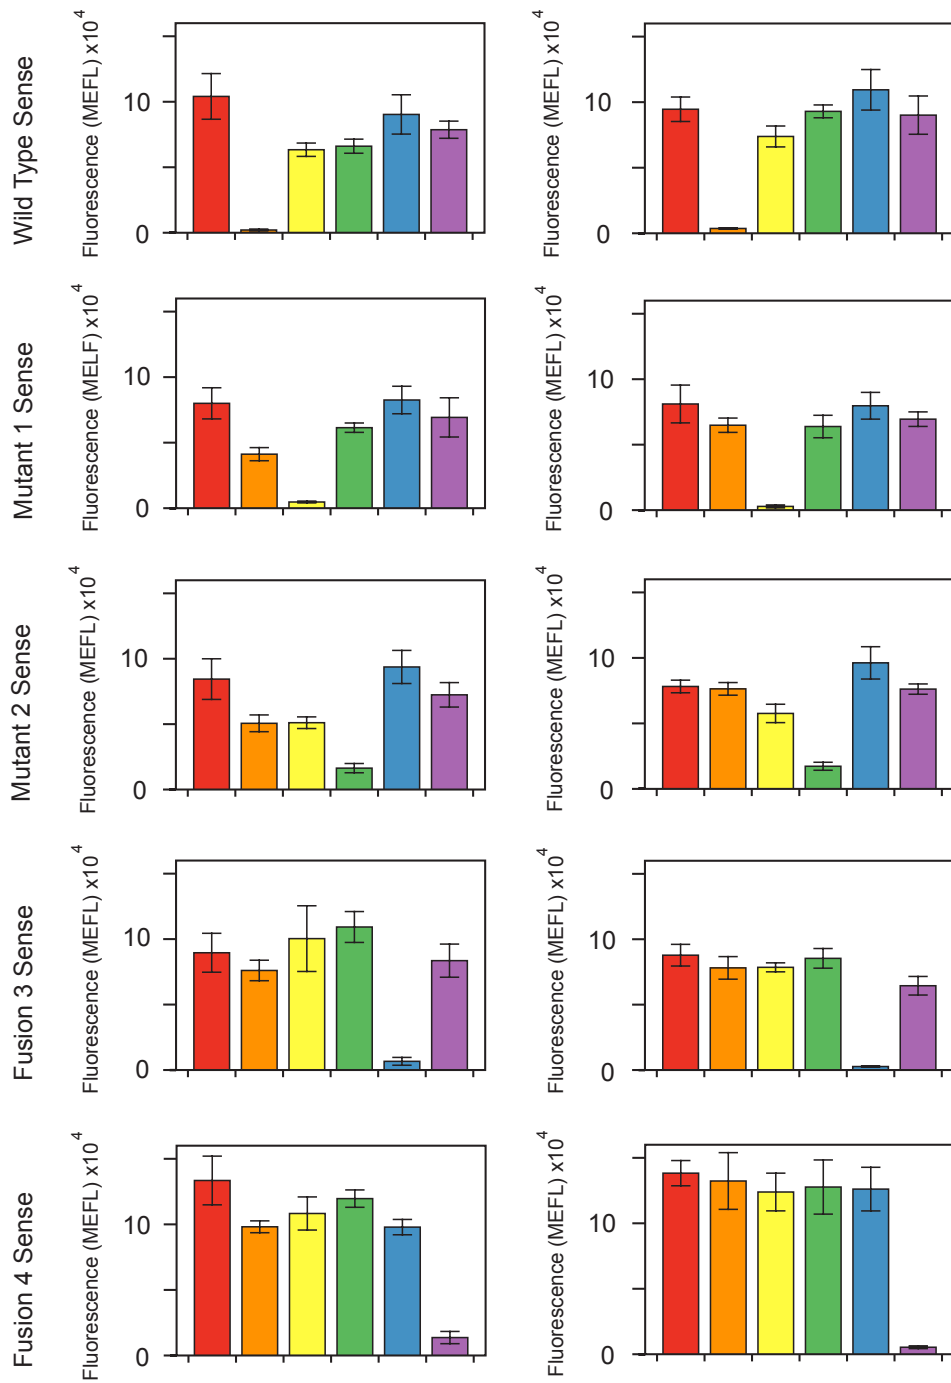

**Supplementary Figure S7:** In vivo expression data used to calculate orthogonality matrices in Figure 5. Functional characterization of orthogonality matrix cognate and non-cognate pairs. Average fluorescence (MEFL) was collected by flow cytometry of *E. coli* TG1 cells with no antisense (red), wild type antisense (orange), mutant 1 antisense (yellow), mutant 2 antisense (green), fusion 3 antisense (blue), or fusion 4 antisense (purple). Error bars represent standard deviations of at least seven biological replicates.



## A No antisense - anti-terminated structure

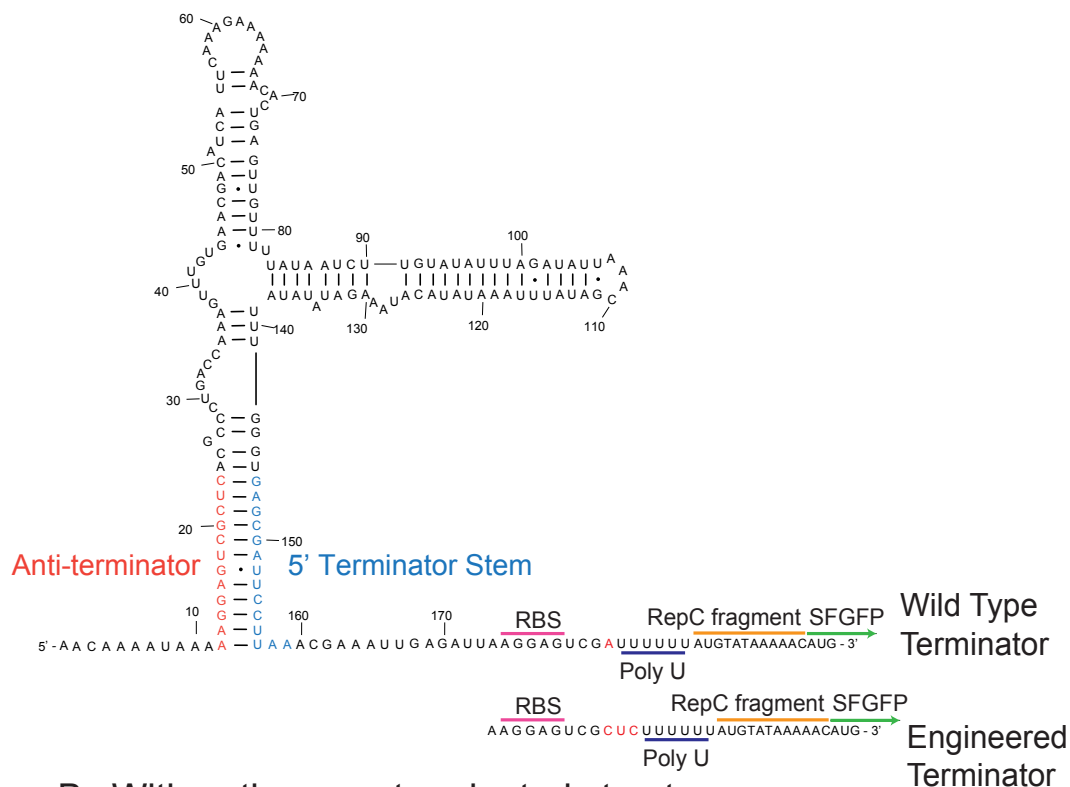

## B With antisense - terminated structure

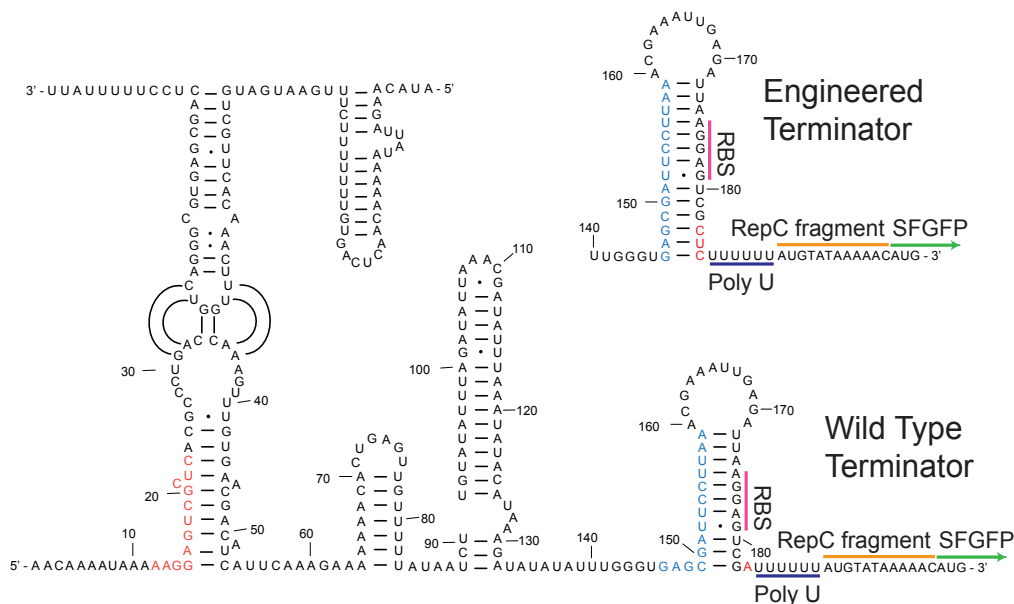

**Supplementary Figure S8:** Sequences and model structures of the schematic shown in Figure 1B with both the anti-terminated structure (ON) in the absence of antisense (A) and the terminated structure (OFF) in the presence of antisense (B). The anti-terminator region is highlighted in orange and the 5' terminator stem is highlighted in blue. The RBS is shown with a pink line, the Poly U with a blue line, the 12 nt RepC fragment with an orange line, and SFGFP coding sequence with a green line. Sequences for both the wild type and engineered terminators are shown. Structures are from Brantl and Wagner (3).

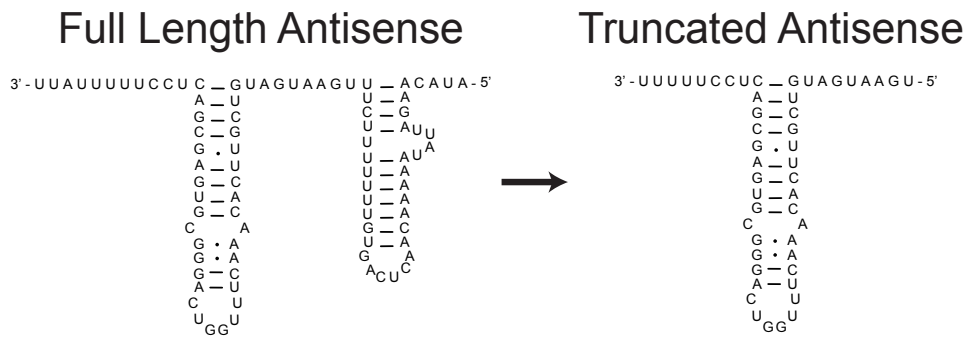

**Supplementary Figure S9:** Sequence and structure of the full length wild type pT181 antisense and the truncated wild type antisense. In order to create the truncated antisense, the first hairpin from the 5' side was removed and sequence was truncated from the 5' stem of the antisense. Structures are from Brantl and Wagner (3).

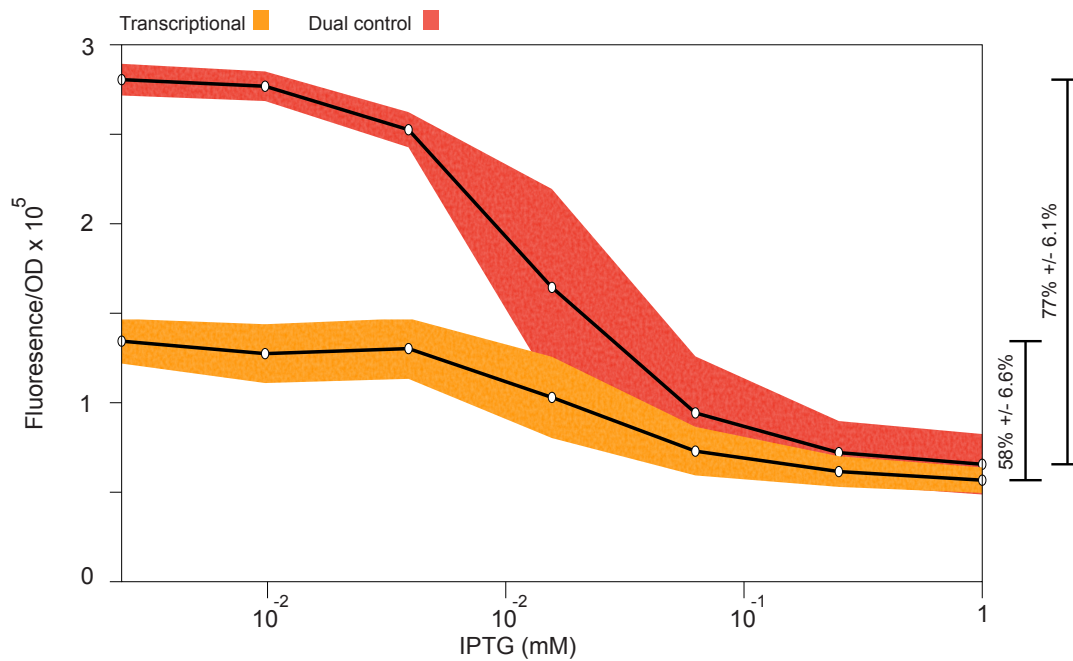

**Supplementary Figure S10:** Induction curves of transcriptional and dual control attenuators. Antisense expression is under the control of the Lac promoter. Experiment performed as described in Supplementary Note S1. Data was analyzed as described in Materials and Methods. The dual control attenuator (red) shows greater dynamic range (77% +/- 6.1%) in response to IPTG induction than the transcriptional (orange) attenuator (58% +/- 6.6%). The colored region indicates the standard deviation from 3 biological replicates.

**Supplementary Table S3:** Averages and standard deviations (MEFL) plotted in Figure 2A and 2B. Values have been rounded to the nearest integer for ease of interpretation.

|                                   | No antisense<br>(average) | With antisense<br>(average) | No antisense<br>(SD) | With antisense<br>(SD) |
|-----------------------------------|---------------------------|-----------------------------|----------------------|------------------------|
| Transcriptional<br>WT terminator  | 40289                     | 14857                       | 7307                 | 1659                   |
| Dual control<br>WT terminator     | 94148                     | 1630                        | 11530                | 260                    |
| Transcriptional<br>Eng terminator | 38699                     | 5849                        | 4207                 | 1132                   |
| Dual control<br>Eng terminator    | 27401                     | 671                         | 3644                 | 181                    |

## A No antisense - Terminated structure

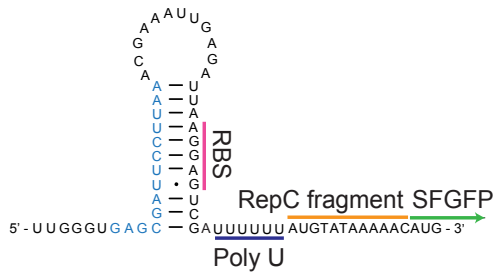

## B With antisense - Anti-terminated structure

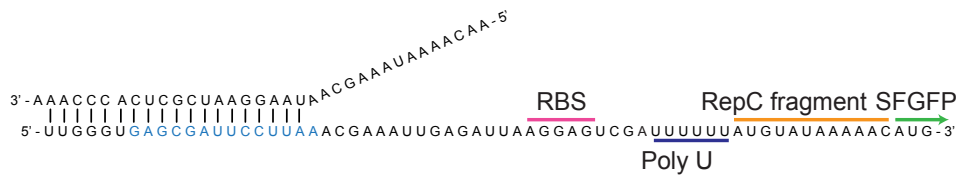

**Supplementary Figure S11:** Sequences and structures of the schematic shown in Figure 3A with both the terminated structure (OFF) in the absence of antisense (A) and the anti-terminated structure (ON) in the presence of antisense (B). The 5' terminator stem is highlighted in blue. The RBS is shown with a pink line, the Poly U with a blue line, the 12 nt RepC fragment with an orange line, and SFGFP with a green line. Structures are derived from diagrams in Chappell et al. (2).

**Supplementary Table S4:** Averages and standard deviations (MEFL) plotted in Figure 3B and 3C. Values have been rounded to the nearest integer for ease of interpretation.

|                      | No antisense<br>(average) | With antisense<br>(average) | No antisense<br>(SD) | With antisense<br>(SD) |
|----------------------|---------------------------|-----------------------------|----------------------|------------------------|
| STAR                 | 3700                      | 37976                       | 695                  | 11837                  |
| Dual control<br>STAR | 115                       | 106062                      | 16                   | 19872                  |



**Supplementary Table S5:** Averages and standard deviations (MEFL) plotted in Figure 4B and 4C. Values have been rounded to the nearest integer for ease of interpretation.

|                             | No antisense<br>(average) | With antisense<br>(average) | No antisense<br>(SD) | With antisense<br>(SD) |
|-----------------------------|---------------------------|-----------------------------|----------------------|------------------------|
| Transcriptional<br>WT       | 38699                     | 5849                        | 4207                 | 1132                   |
| Dual control WT             | 94590                     | 3671                        | 9334                 | 455                    |
| Transcriptional<br>Mutant 1 | 38311                     | 7369                        | 4557                 | 776                    |
| Dual control<br>Mutant 1    | 81071                     | 2832                        | 14435                | 1116                   |
| Transcriptional<br>Mutant 2 | 37943                     | 14133                       | 2518                 | 867                    |
| Dual control<br>Mutant 2    | 78197                     | 17278                       | 4814                 | 3053                   |
| Transcriptional<br>Fusion 3 | 36984                     | 6935                        | 3957                 | 844                    |
| Dual control<br>Fusion 3    | 87808                     | 2675                        | 8282                 | 432                    |
| Transcriptional<br>Fusion 4 | 48829                     | 10917                       | 4764                 | 2190                   |
| Dual control<br>Fusion 4    | 138298                    | 5338                        | 9637                 | 1056                   |



**Supplementary Table S6:** Standard deviations for the percent repressions presented in Figure 5B with full-length antisense. Bolded cells indicate the diagonal.

|             | WT full AS  | Mut 1 full AS | Mut 2 full AS | Fus 3 full AS | Fus 4 full AS |
|-------------|-------------|---------------|---------------|---------------|---------------|
| WT sense    | <b>0.77</b> | 11.31         | 11.82         | 20.47         | 14.14         |
| Mut 1 sense | 9.89        | <b>1.23</b>   | 12.25         | 20.17         | 22.70         |
| Mut 2 sense | 13.39       | 12.32         | <b>5.50</b>   | 25.33         | 19.28         |
| Fus 3 sense | 16.57       | 33.62         | 24.14         | <b>3.56</b>   | 20.95         |
| Fus 4 sense | 10.78       | 14.73         | 13.43         | 11.11         | <b>3.78</b>   |

**Supplementary Table S7:** Standard deviations for the percent repression presented in Figure 5C with truncated antisense. Bolded cells indicate the diagonal.

|             | WT trunc AS | Mut 1 trunc AS | Mut 2 trunc AS | Fus 3 trunc AS | Fus 4 trunc AS |
|-------------|-------------|----------------|----------------|----------------|----------------|
| WT sense    | <b>0.62</b> | 11.42          | 10.99          | 19.93          | 18.07          |
| Mut 1 sense | 15.76       | <b>1.51</b>    | 17.57          | 21.57          | 16.72          |
| Mut 2 sense | 8.61        | 10.06          | <b>4.13</b>    | 17.50          | 7.83           |
| Fus 3 sense | 12.92       | 9.30           | 12.55          | <b>0.57</b>    | 10.65          |
| Fus 4 sense | 17.02       | 12.14          | 16.28          | 13.62          | <b>0.81</b>    |

## References

1. Bustin, S.A., Benes, V., Garson, J.A., Hellems, J., Huggett, J., Kubista, M., Mueller, R., Nolan, T., Pfaffl, M.W., Shipley, G.L., et al. (2009) The MIQE Guidelines: minimum information for publication of quantitative real-time PCR experiments. *Clin. Chem.*, **55**, 611-622.
2. Chappell, J., Takahashi, M.K. and Lucks, J.B. (2015) Creating small transcription activating RNAs. *Nat. Chem. Biol.*, **11**, 214–220.
3. Brantl, S. and Wagner, E.G. (2000) Antisense RNA-mediated transcriptional attenuation: an in vitro study of plasmid pT181. *Mol. Microbiol.*, **35**, 1469–1482.
4. Lucks, J.B., Qi, L., Mutalik, V.K., Wang, D. and Arkin, A.P. (2011) Versatile RNA-sensing transcriptional regulators for engineering genetic networks. *Proc. Natl. Acad. Sci. U.S.A.*, **108**, 8617–8622.
5. Takahashi, M.K. and Lucks, J.B. (2013) A modular strategy for engineering orthogonal chimeric RNA transcription regulators. *Nucleic Acids Research*, **41**, 7577–7588.
